# Supplementary material for: Porosity control in pillar-layered MOF architectures: hydrogen bonding in amino-functionalized 2-D layers
Source: Royal Society of Chemistry journal article supplement (doi:10.1039/d4ce00503a), 2024-01-01
Supplement: d4ce00503a1.pdf [file d4ce00503a1.pdf]

# Porosity Control in Pillar-Layered MOF Architectures: Hydrogen Bonding in Amino-Functionalized 2D Layers

Fatemeh Tavakoli-Quchani <sup>a</sup>, Alireza Salimi\* <sup>a</sup>, and Ali Nakhaei Pour

<sup>a</sup> Department of Chemistry, Faculty of Science, Ferdowsi University of Mashhad, Mashhad, Iran

\* E-mail: salimi-a@um.ac.ir

## Supporting Information

### S0. List of Contents

|                    |                                                                                                                                                       |             |
|--------------------|-------------------------------------------------------------------------------------------------------------------------------------------------------|-------------|
| <b>Figure S0.</b>  | List of Contents                                                                                                                                      | <b>P.1</b>  |
| <b>Figure S1.</b>  | The designed device for the FUMs synthesis.                                                                                                           | <b>P.2</b>  |
| <b>Figure S2.</b>  | The FE-SEM images of (a) <b>FUM-153(Zn-H)</b> , (b) <b>FUM-153(Zn-H)*</b> , (c) <b>FUM-167(Cd-H)</b> , and (d) <b>FUM-176(Cd-NH<sub>2</sub>)</b> .    | <b>P.2</b>  |
| <b>Figure S3.</b>  | The overlay of PXRD plots of (a) <b>FUM-153(Zn-H)</b> , (b) <b>FUM-167(Cd-H)</b> , and (c) <b>FUM-176(Cd-NH<sub>2</sub>)</b> .                        | <b>P.3</b>  |
| <b>Figure S4.</b>  | The FT-IR plot of (a) <b>FUM-153(Zn-H)</b> , (b) <b>FUM-153(Zn-H)*</b> , (c) <b>FUM-167(Cd-H)</b> , and (d) <b>FUM-176(Cd-NH<sub>2</sub>)</b> .       | <b>P.5</b>  |
| <b>Figure S5.</b>  | The TGA analysis of (a) <b>FUM-153(Zn-H)</b> , (b) <b>FUM-167(Cd-H)</b> , and (c) <b>FUM-176(Cd-NH<sub>2</sub>)</b> .                                 | <b>P.4</b>  |
| <b>Figure S6.</b>  | The DTA analysis of (a) <b>FUM-153(Zn-H)</b> , (b) <b>FUM-167(Cd-H)</b> , and (c) <b>FUM-176(Cd-NH<sub>2</sub>)</b> .                                 | <b>P.8</b>  |
| <b>Figure S7.</b>  | The representation of FT-SEM of <b>FUM-153(Zn-H)</b> and <b>FUM-153(Zn-H)*</b> .                                                                      | <b>P.8</b>  |
| <b>Figure S8.</b>  | The representation of the 2-fold interpenetrating in <b>FUM-153(Zn-H)</b> .                                                                           | <b>P.9</b>  |
| <b>Figure S9.</b>  | The representation of $\pi \cdots \pi$ interactions in <b>FUM-153(Zn-H)</b> .                                                                         | <b>P.9</b>  |
| <b>Figure S10.</b> | The representation of the 2-fold interpenetrating in <b>FUM-167(Cd-H)</b> .                                                                           | <b>P.10</b> |
| <b>Figure S11.</b> | The representation of C40 O11 $\cdots$ C47 N7 <sub>amide</sub> and C29A O10A $\cdots$ H52 C52 interactions interpenetrating in <b>FUM-167(Cd-H)</b> . | <b>P.11</b> |
| <b>Figure S12.</b> | The representation of the 2-fold interpenetrating in <b>FUM-176(Cd-NH<sub>2</sub>)</b> .                                                              | <b>P.11</b> |
| <b>Chart S1.</b>   | CH <sub>4</sub> and CO <sub>2</sub> gas adsorption result in the three FUMs.                                                                          | <b>P.11</b> |
| <b>Table S1.</b>   | The calculated gas adsorption results of all FUMs.                                                                                                    | <b>P.12</b> |

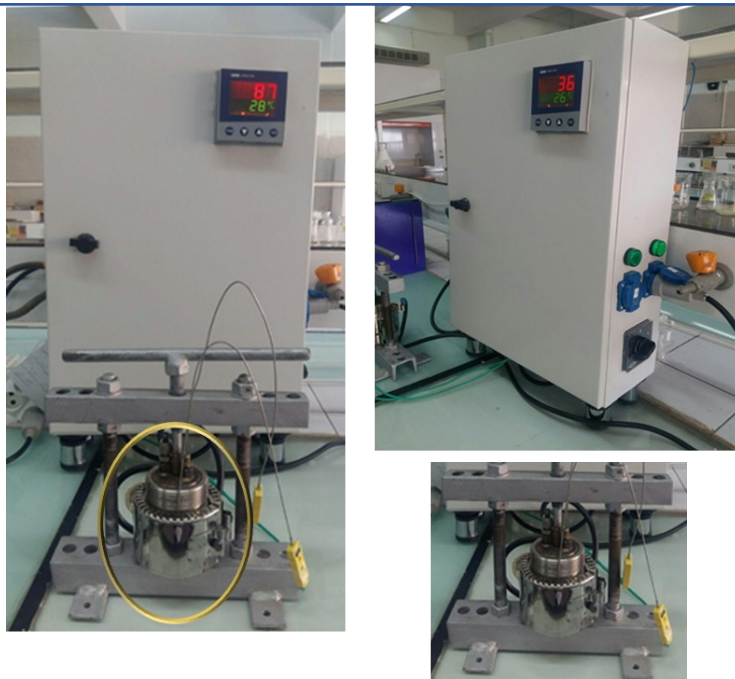

**Figure S1.** The designed device for the FUMs synthesis.

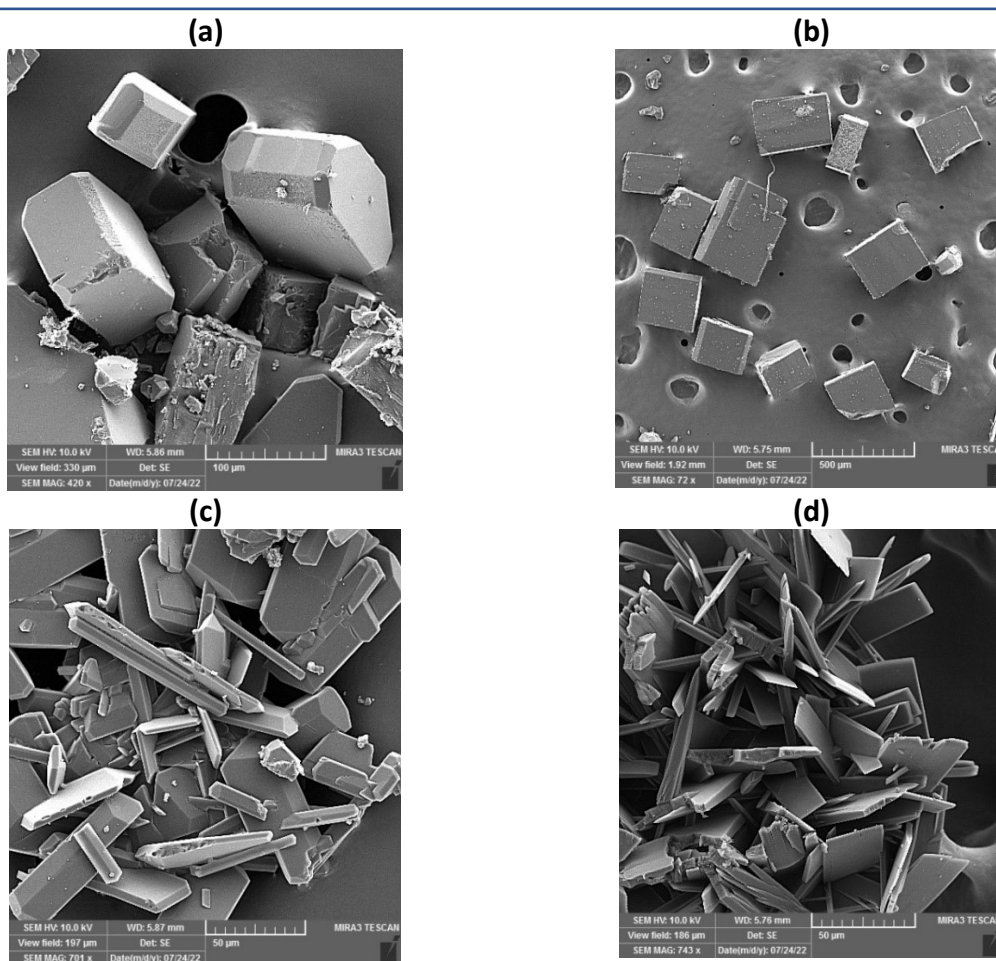

**Figure S2.** The FE-SEM images of (a) FUM-153(Zn-H), (b) FUM-153(Zn-H)\*, (c) FUM-167(Cd-H), and (d) FUM-176(Cd-NH<sub>2</sub>).

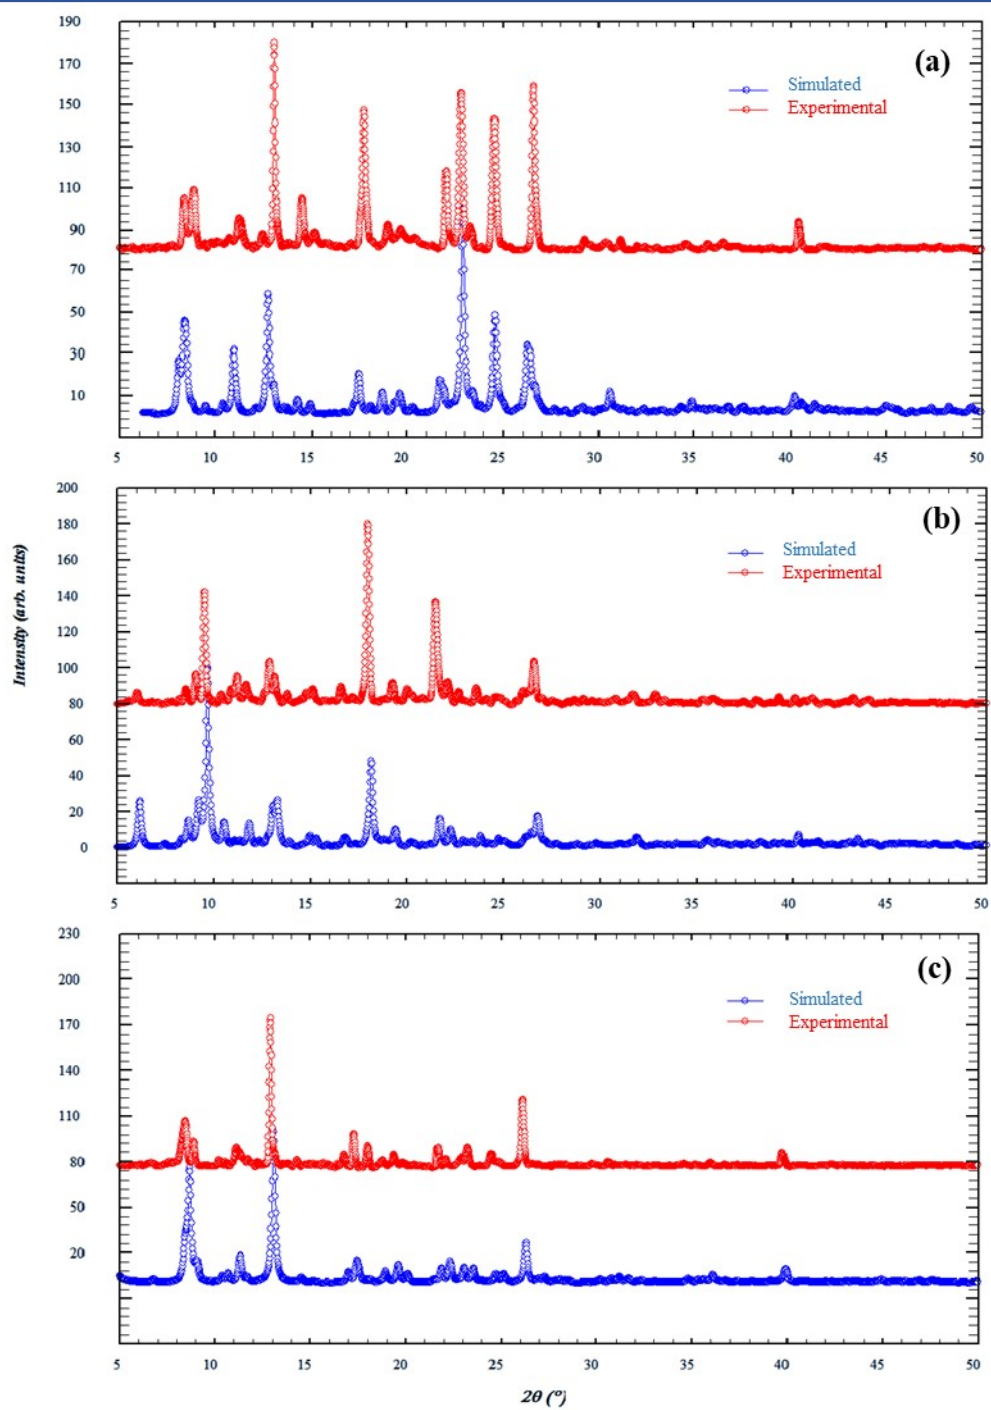

**Figure S3.** The overlay of PXR D plots of (a) FUM-153(Zn-H), (b) FUM-167(Cd-H), and (c) FUM-176(Cd-NH<sub>2</sub>).

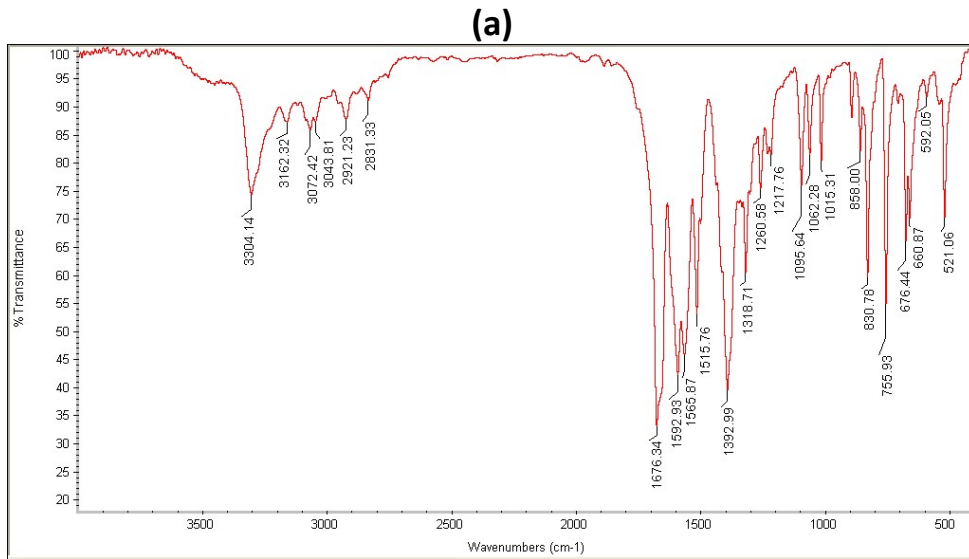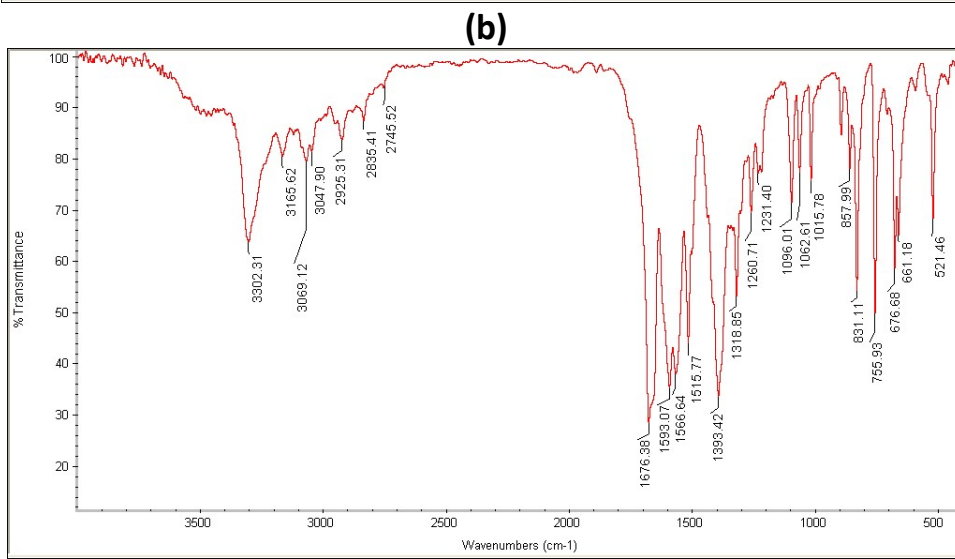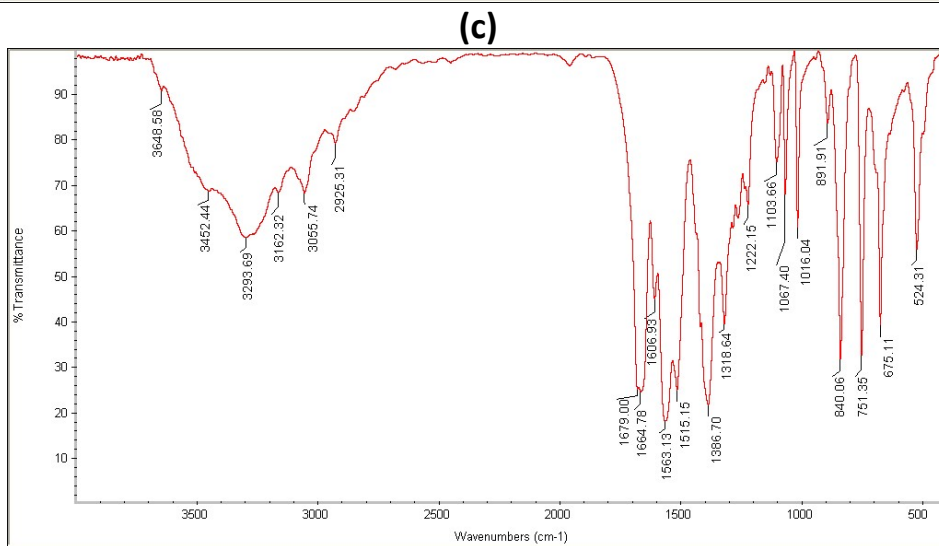

**(d)**

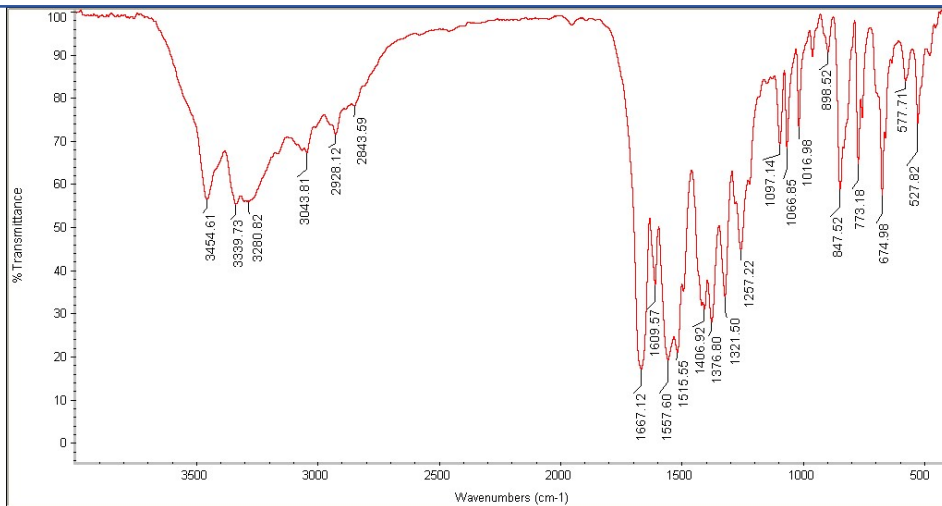

**Figure S4.** The FT-IR plot of (a) FUM-153(Zn-H), (b) FUM-153(Zn-H)\*, (c) FUM-167(Cd-H), and (d) FUM-176(Cd-NH<sub>2</sub>).

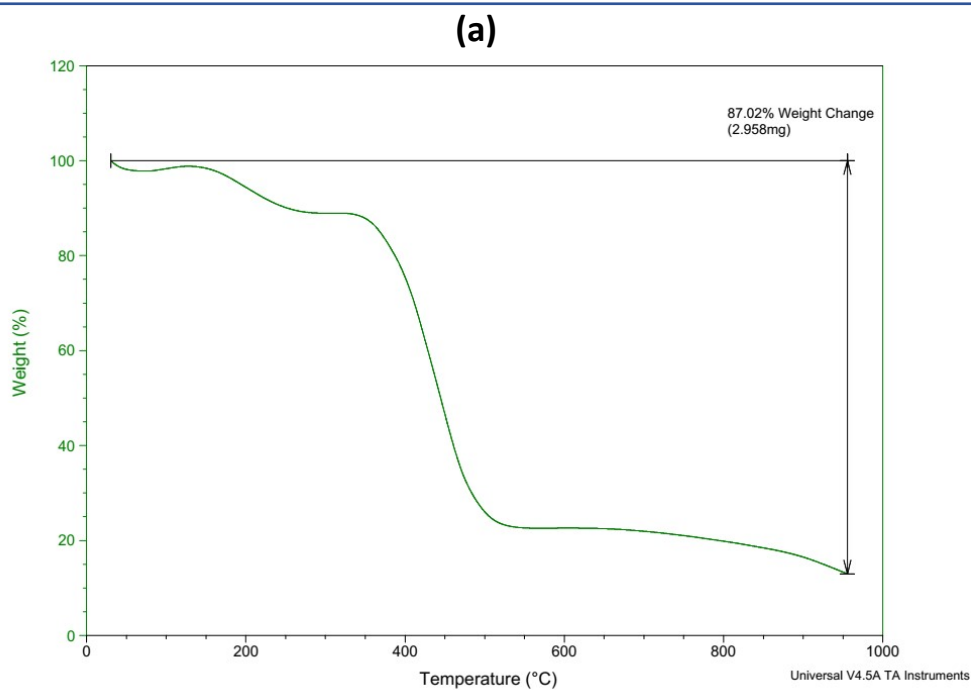

(b)

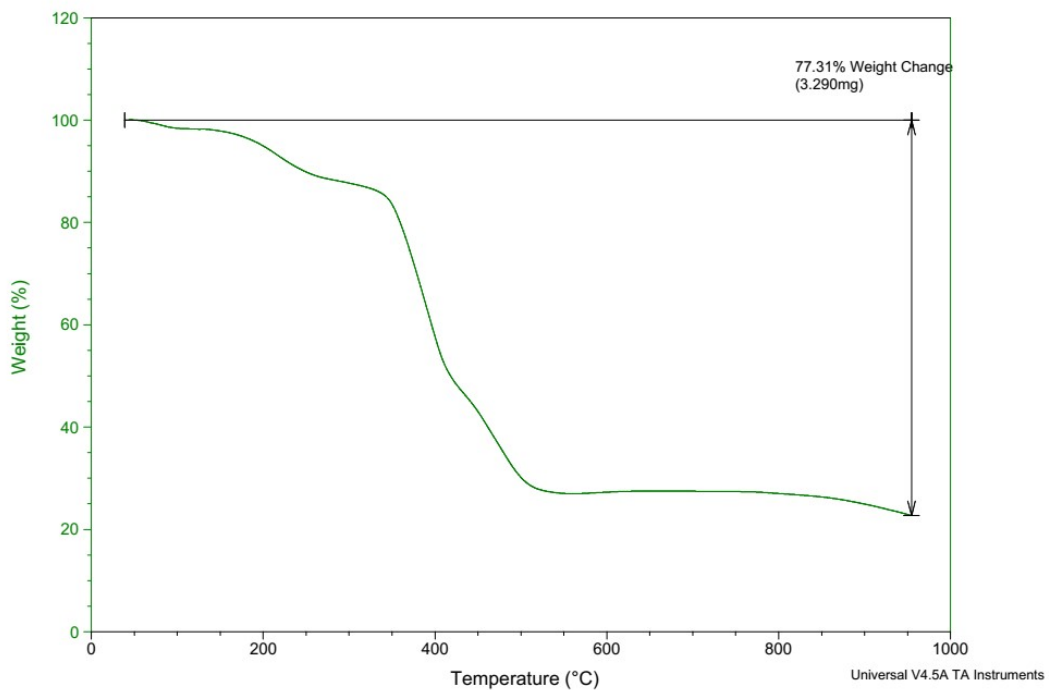

(c)

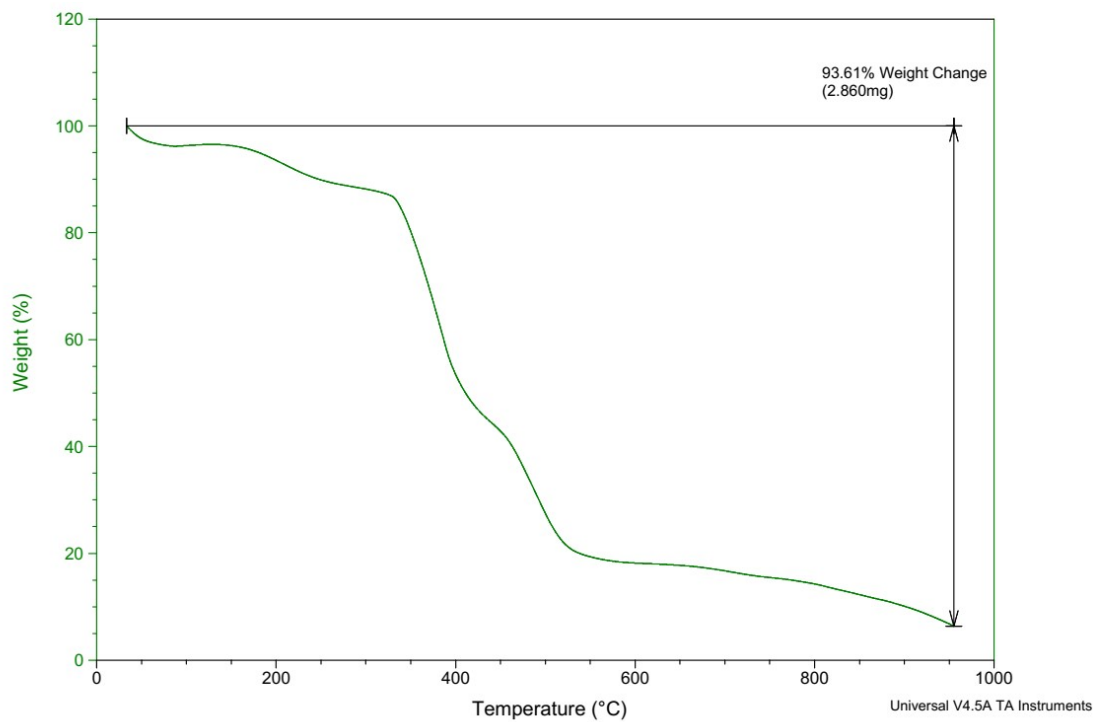

Figure S5. The TGA analysis of (a) FUM-153(Zn-H), (b) FUM-167(Cd-H), and (c) FUM-176(Cd-NH<sub>2</sub>).

(a)

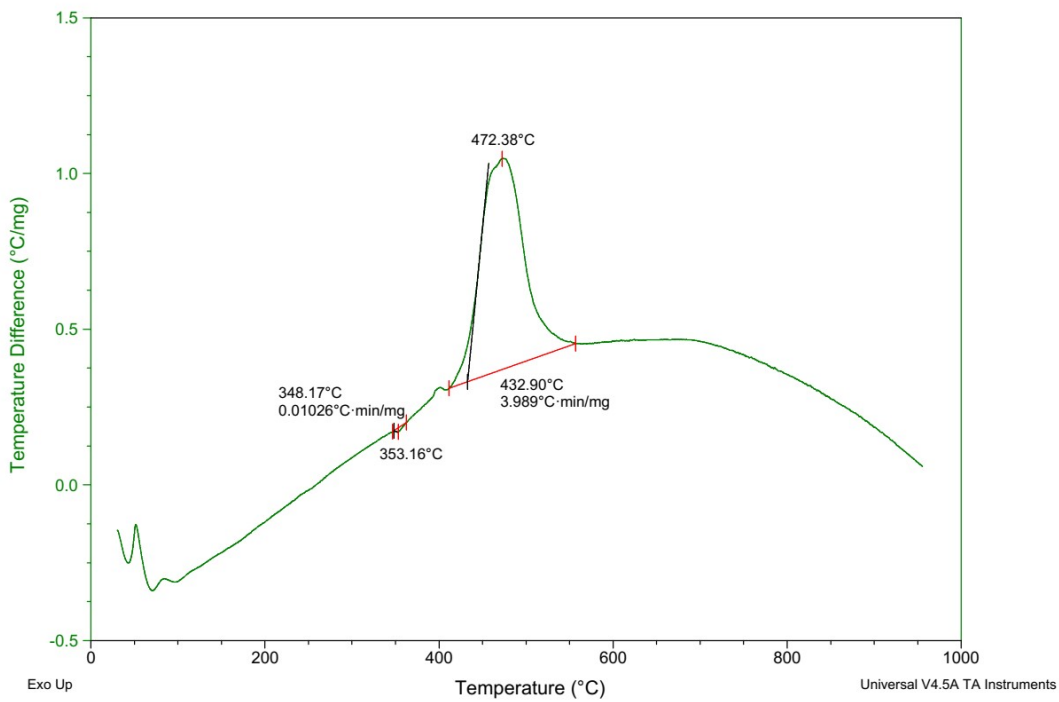

(b)

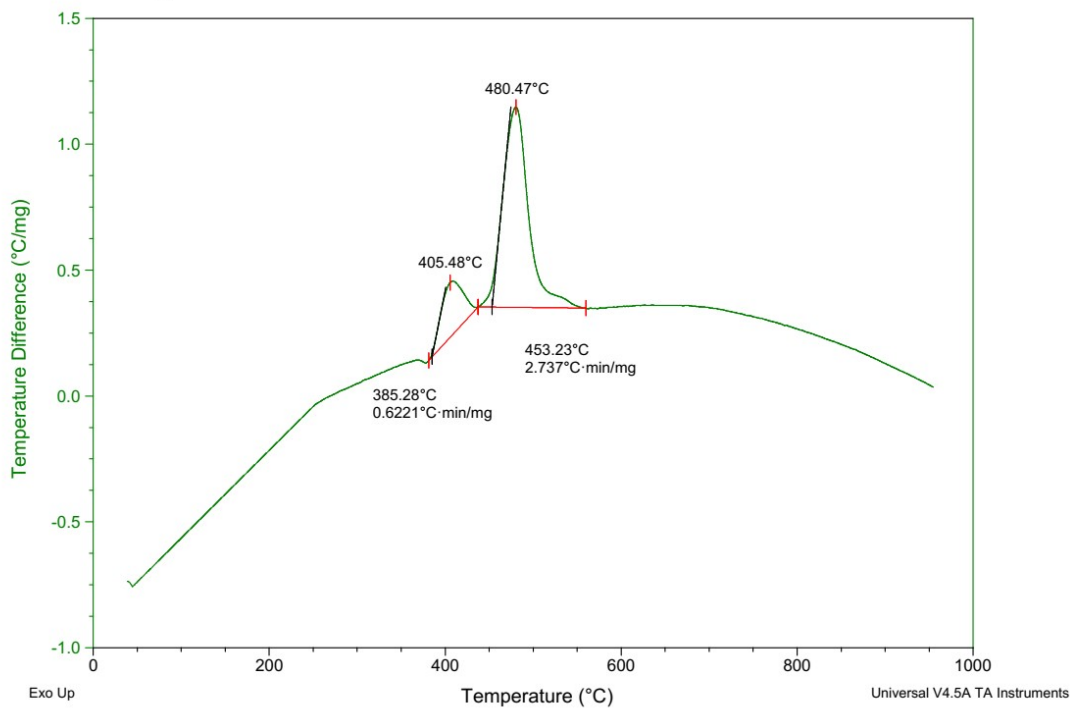

(c)



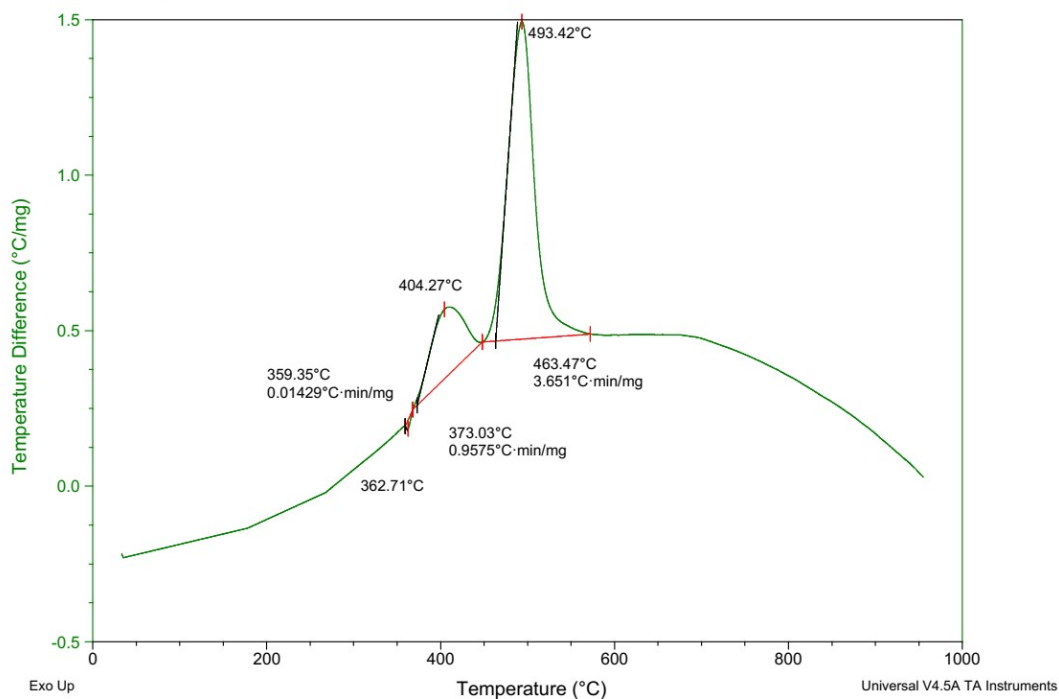

Figure S6. The DTA analysis of (a) FUM-153(Zn-H), (b) FUM-167(Cd-H), and (c) FUM-176(Cd-NH<sub>2</sub>).

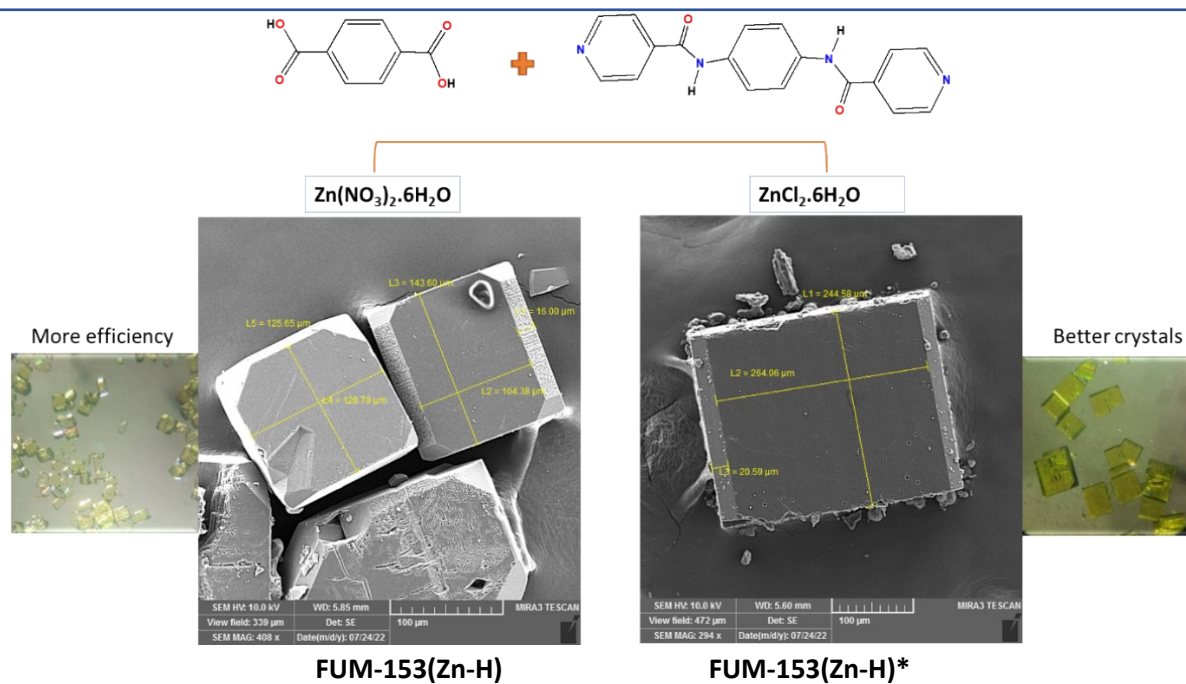

Figure S7. The representation of FT-SEM of FUM-153(Zn-H) and FUM-153(Zn-H)\*.



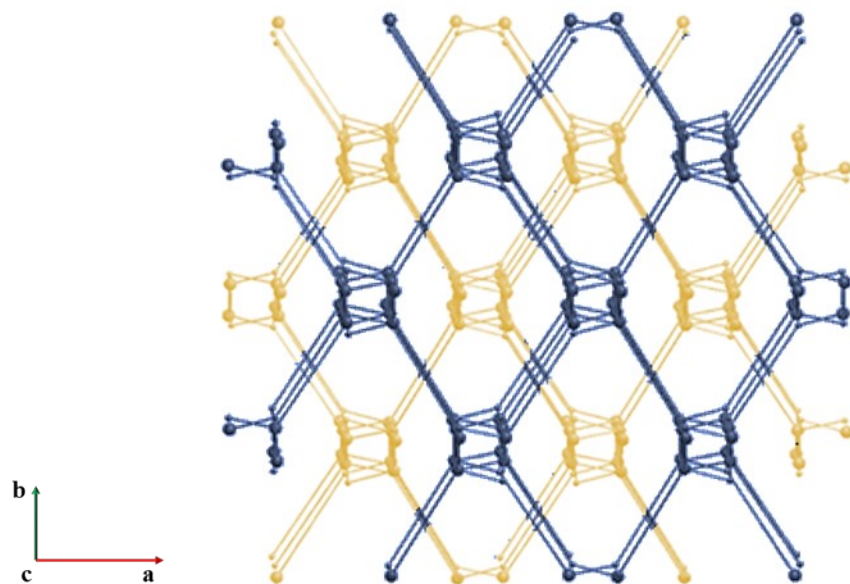

**Figure S8.** The representation of the 2-fold interpenetrating in **FUM-153(Zn-H)**.

---

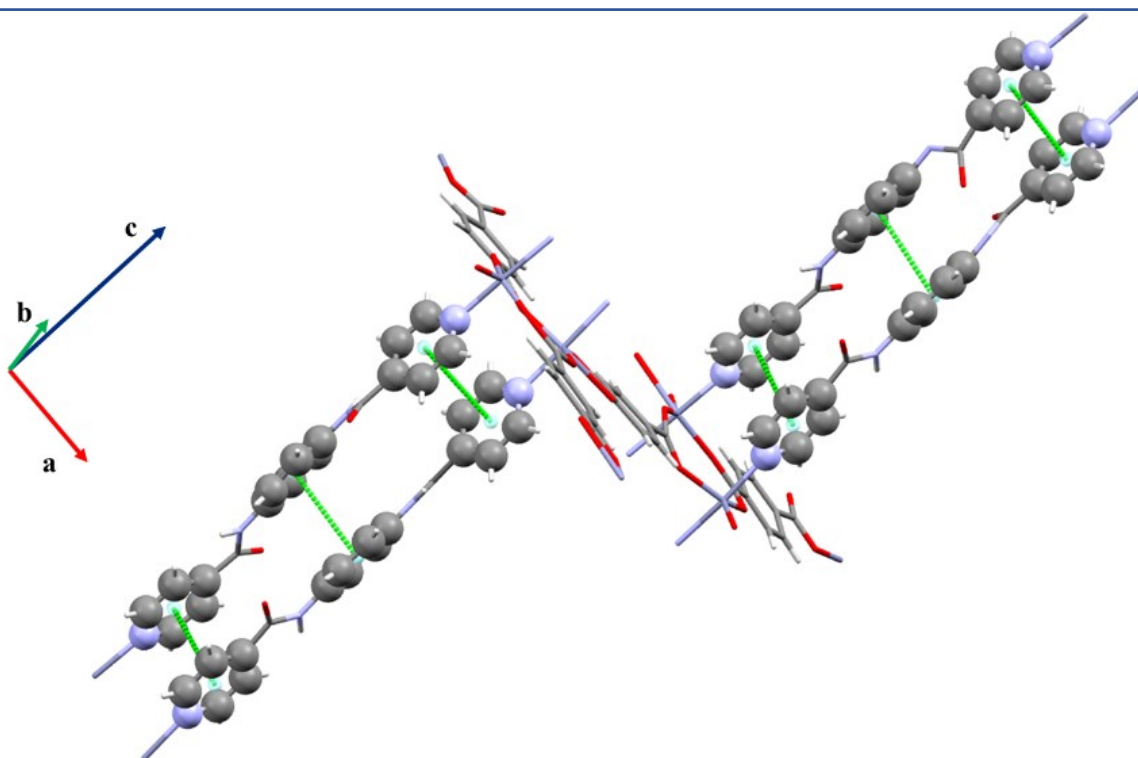

**Figure S9.** The representation of  $\pi\cdots\pi$  interactions in **FUM-153(Zn-H)**.

---

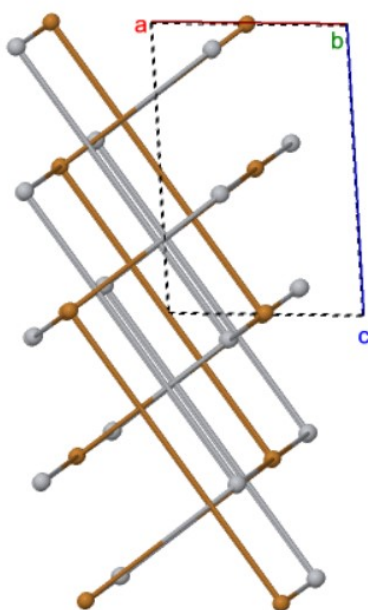

**Figure S10.** The representation of the 2-fold interpenetrating in **FUM-167(Cd-H)**.

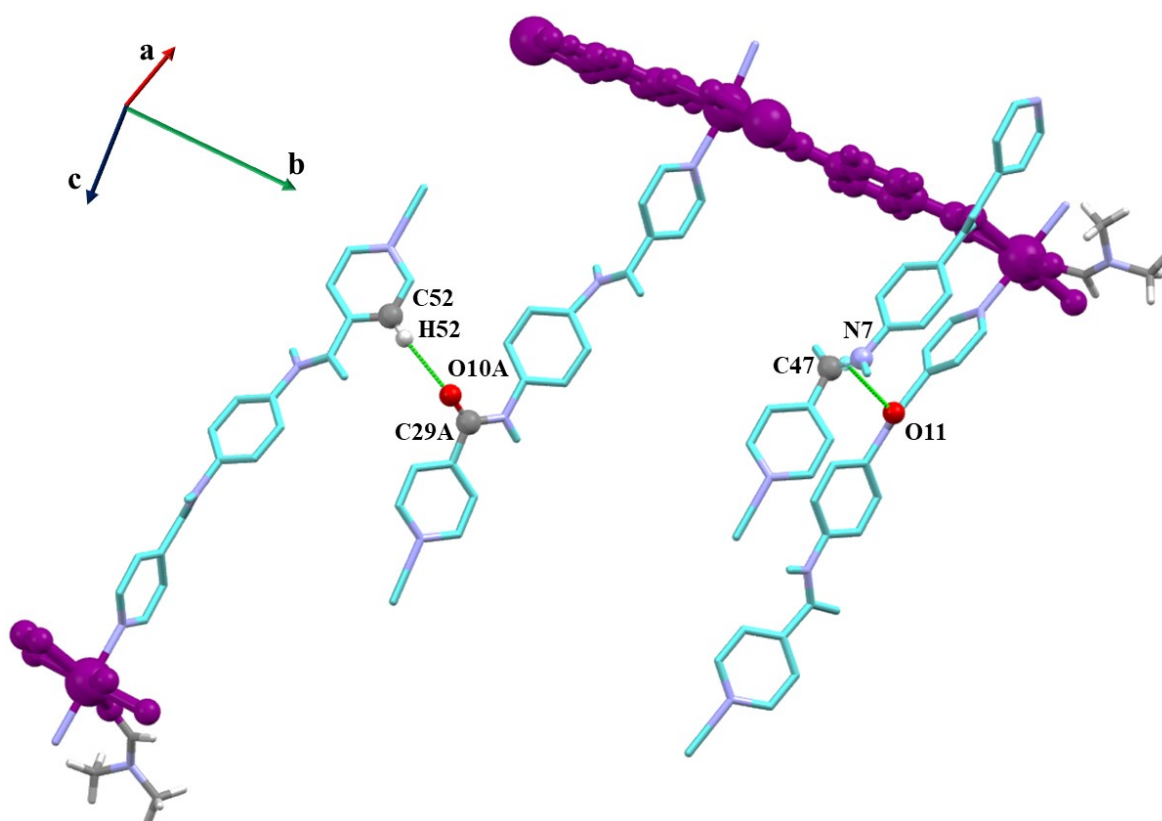

**Figure S11.** The representation of  $C40 \cdots O11 \cdots C47$   $N7_{amide}$  and  $C29A \cdots O10A \cdots H52$   $C52$  interactions interpenetrating in **FUM-167(Cd-H)**.

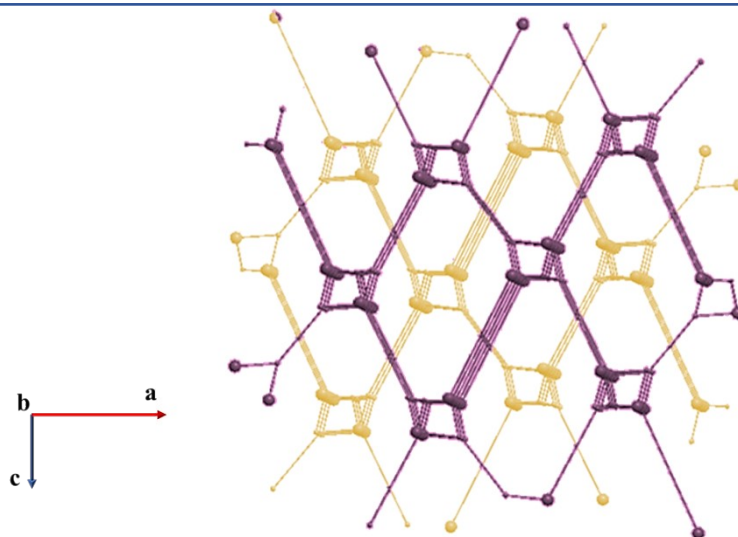

**Figure S12.** The representation of the 2-fold interpenetrating in **FUM-176(Cd-NH<sub>2</sub>)**.

**Chart S1.** CH<sub>4</sub> and CO<sub>2</sub> gas adsorption result in the three FUMs.

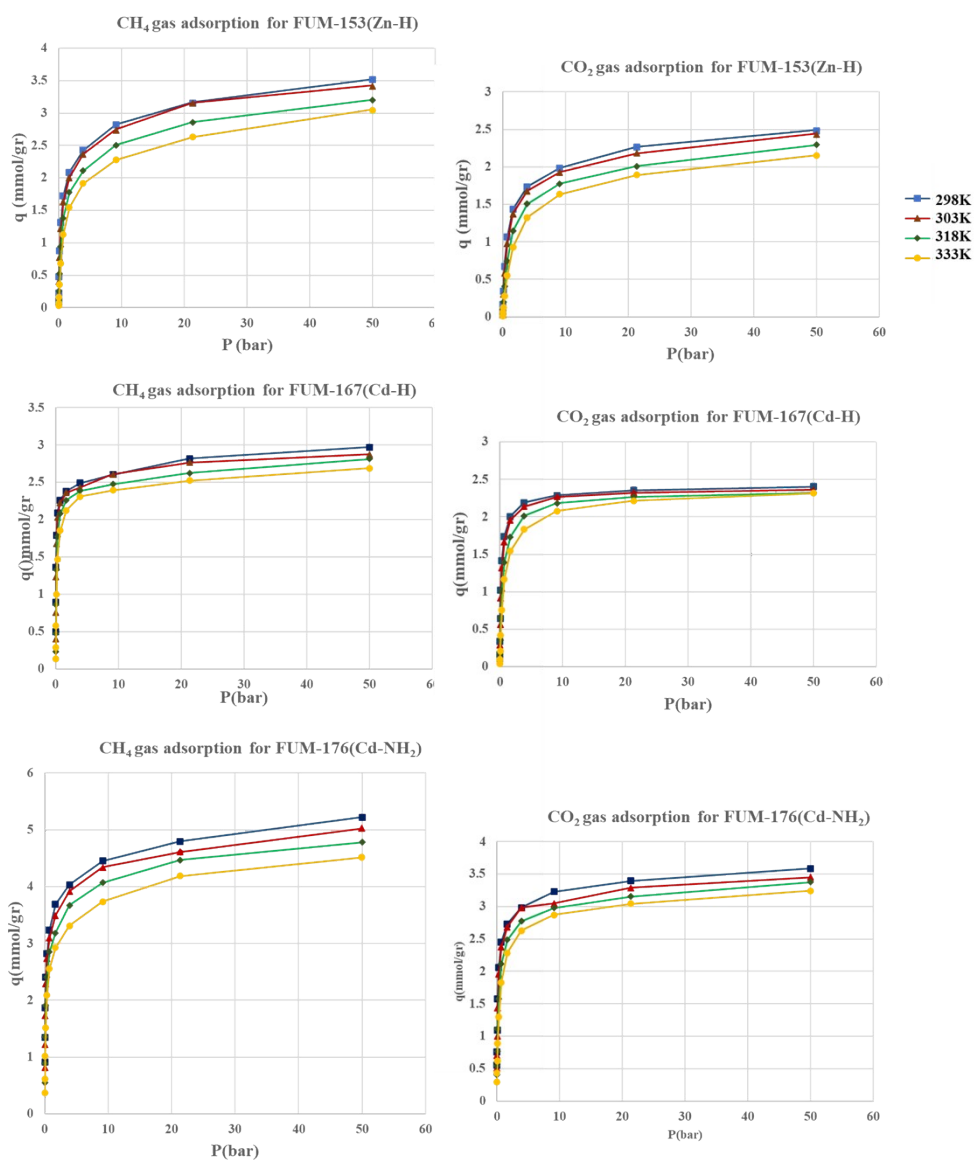

**Table S1.** The calculated gas adsorption results of all FUMs.

| <b>FUM-153(Zn-H)</b>              |                        |                             |                                 |                                  |                                  |
|-----------------------------------|------------------------|-----------------------------|---------------------------------|----------------------------------|----------------------------------|
| <b>CH<sub>4</sub> adsorption</b>  | <b>Temperature (K)</b> | <b>b (bar<sup>-1</sup>)</b> | <b>q<sub>sat</sub> (mmol/g)</b> | <b>Isosteric heat (kcal/mol)</b> | <b>ΔH<sub>ads</sub> (kJ/mol)</b> |
|                                   | 298                    | 1.08                        | 3.52                            | 7.78                             | -12.86                           |
|                                   | 303                    | 1.06                        | 3.42                            | 7.74                             |                                  |
|                                   | 318                    | 0.83                        | 3.20                            | 7.64                             |                                  |
|                                   | 333                    | 0.63                        | 3.05                            | 7.57                             |                                  |
| <b>FUM-153(Zn-H)</b>              |                        |                             |                                 |                                  |                                  |
| <b>CO<sub>2</sub> adsorption</b>  | <b>Temperature (K)</b> | <b>b (bar<sup>-1</sup>)</b> | <b>q<sub>sat</sub> (mmol/g)</b> | <b>Isosteric heat (kcal/mol)</b> | <b>ΔH<sub>ads</sub> (kJ/mol)</b> |
|                                   | 298                    | 0.83                        | 2.49                            | 6.71                             | -16.06                           |
|                                   | 303                    | 0.75                        | 2.44                            | 6.69                             |                                  |
|                                   | 318                    | 0.56                        | 2.29                            | 6.65                             |                                  |
|                                   | 333                    | 0.42                        | 2.15                            | 6.62                             |                                  |
| <b>FUM-167(Cd-H)</b>              |                        |                             |                                 |                                  |                                  |
| <b>CH<sub>4</sub> adsorption</b>  | <b>Temperature (K)</b> | <b>b (bar<sup>-1</sup>)</b> | <b>q<sub>sat</sub> (mmol/g)</b> | <b>Isosteric heat (kcal/mol)</b> | <b>ΔH<sub>ads</sub> (kJ/mol)</b> |
|                                   | 298                    | 2.78                        | 2.97                            | 8.69                             | -6.58                            |
|                                   | 303                    | 3.27                        | 2.87                            | 8.67                             |                                  |
|                                   | 318                    | 2.50                        | 2.81                            | 8.65                             |                                  |
|                                   | 333                    | 2.30                        | 2.68                            | 8.64                             |                                  |
| <b>FUM-167(Cd-H)</b>              |                        |                             |                                 |                                  |                                  |
| <b>CO<sub>2</sub> adsorption</b>  | <b>Temperature (K)</b> | <b>b (bar<sup>-1</sup>)</b> | <b>q<sub>sat</sub> (mmol/g)</b> | <b>Isosteric heat (kcal/mol)</b> | <b>ΔH<sub>ads</sub> (kJ/mol)</b> |
|                                   | 298                    | 3.78                        | 2.40                            | 8.18                             | -25.48                           |
|                                   | 303                    | 3.68                        | 2.35                            | 8.19                             |                                  |
|                                   | 318                    | 2.23                        | 2.32                            | 8.20                             |                                  |
|                                   | 333                    | 1.33                        | 2.31                            | 8.21                             |                                  |
| <b>FUM-176(Cd-NH<sub>2</sub>)</b> |                        |                             |                                 |                                  |                                  |
| <b>CH<sub>4</sub> adsorption</b>  | <b>Temperature (K)</b> | <b>b (bar<sup>-1</sup>)</b> | <b>q<sub>sat</sub> (mmol/g)</b> | <b>Isosteric heat (kcal/mol)</b> | <b>ΔH<sub>ads</sub> (kJ/mol)</b> |
|                                   | 298                    | 1.85                        | 5.22                            | 8.79                             | -5.406                           |
|                                   | 303                    | 1.88                        | 5.02                            | 8.75                             |                                  |
|                                   | 318                    | 1.74                        | 4.78                            | 8.72                             |                                  |
|                                   | 333                    | 1.48                        | 4.51                            | 8.67                             |                                  |
| <b>FUM-176(Cd-NH<sub>2</sub>)</b> |                        |                             |                                 |                                  |                                  |
| <b>CO<sub>2</sub> adsorption</b>  | <b>Temperature (K)</b> | <b>b (bar<sup>-1</sup>)</b> | <b>q<sub>sat</sub> (mmol/g)</b> | <b>Isosteric heat (kcal/mol)</b> | <b>ΔH<sub>ads</sub> (kJ/mol)</b> |
|                                   | 298                    | 2.52                        | 3.58                            | 8.02                             | -8.67                            |
|                                   | 303                    | 2.57                        | 3.45                            | 8.00                             |                                  |
|                                   | 318                    | 2.02                        | 3.37                            | 8.02                             |                                  |
|                                   | 333                    | 1.81                        | 3.24                            | 8.03                             |                                  |
